# Supplementary material
Source: PubMed Central journal article supplement (PMC8395653)
Supplement: au1c00027_si_003.pdf [file au1c00027_si_003.pdf]

## Supplementary dataset S2

### Compound characterisation data for isolated amino acid products

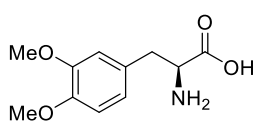

#### (S)-2-amino-3-(3,4-dimethoxyphenyl)propanoic acid (6o)

White solid, 81% isolated yield.

$^1\text{H NMR}$  (400 MHz,  $\text{D}_2\text{O}+\text{NaOH}$ ):  $\delta$  6.91 (d,  $J = 8.2$ , 1H), 6.84 (d,  $J = 1.8$ , 1H), 6.77 (dd,  $J = 8.2$ , 1.8, 1H), 3.78 (s, 3H), 3.76 (s, 3H), 3.40 (dd<sub>X</sub> of ABX,  $J = 7.1$ , 5.6, 1H), 2.86 (dd<sub>A</sub> of ABX,  $J = 13.6$ , 5.6, 1H), 2.73 (dd<sub>B</sub> of ABX,  $J = 13.6$ , 7.1, 1H).

$^{13}\text{C NMR}$  (101 MHz,  $\text{D}_2\text{O}+\text{NaOH}$ ):  $\delta$  182.4, 147.8, 146.6, 131.3, 121.9, 112.9, 111.8, 57.3, 55.6, 55.5, 40.2.

**HRMS** (ESI):  $m/z$   $[\text{M}+\text{H}]^+$   $\text{C}_{11}\text{H}_{16}\text{NO}_4^+$  calcd. 226.1074, found 226.1084.

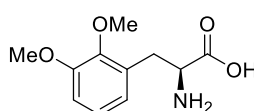

#### (S)-2-amino-3-(2,3-dimethoxyphenyl)propanoic acid (6m)

White solid, 75% isolated yield.

$^1\text{H NMR}$  (400 MHz,  $\text{D}_2\text{O}+\text{NaOH}$ ):  $\delta$  7.05 (dd,  $J = 8.3$ , 7.7, 1H), 6.93 (dd,  $J = 8.3$ , 1.3, 1H), 6.82 (dd,  $J = 7.7$ , 1.3, 1H), 3.80 (s, 3H), 3.72 (s, 3H), 3.41 (dd<sub>X</sub> of ABX,  $J = 8.4$ , 5.8, 1H), 2.95 (dd<sub>A</sub> of ABX,  $J = 13.5$ , 5.8, 1H), 2.72 (dd<sub>B</sub> of ABX,  $J = 13.5$ , 8.4, 1H).

$^{13}\text{C NMR}$  (101 MHz,  $\text{D}_2\text{O}+\text{NaOH}$ ):  $\delta$  182.5, 152.2, 146.6, 132.3, 124.8, 123.0, 111.6, 68.8, 57.1, 55.7, 34.9.

**HRMS** (ESI):  $m/z$   $[\text{M}+\text{H}]^+$   $\text{C}_{11}\text{H}_{16}\text{NO}_4^+$  calcd. 226.1074, found 226.1075.

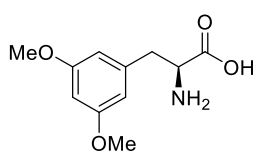

#### (S)-2-amino-3-(3,5-dimethoxyphenyl)propanoic acid (6q)

White solid, 79% isolated yield.

$^1\text{H NMR}$  (400 MHz,  $\text{D}_2\text{O}+\text{NaOH}$ ):  $\delta$  6.45 (d,  $J = 2.3$ , 2H), 6.39 (t,  $J = 2.3$ , 1H), 3.74 (s, 6H), 3.42 (dd<sub>X</sub> of ABX,  $J = 7.4$ , 5.5, 1H), 2.88 (dd<sub>A</sub> of ABX,  $J = 13.5$ , 5.5, 1H), 2.71 (dd<sub>B</sub> of ABX,  $J = 13.5$ , 7.4, 1H).

$^{13}\text{C NMR}$  (101 MHz,  $\text{D}_2\text{O}+\text{NaOH}$ ):  $\delta$  182.2, 160.0, 141.0, 107.7, 98.6, 57.2, 55.3, 40.9.

**HRMS** (ESI):  $m/z$   $[\text{M}+\text{H}]^+$   $\text{C}_{11}\text{H}_{16}\text{NO}_4^+$  calcd. 226.1074, found 226.1090.

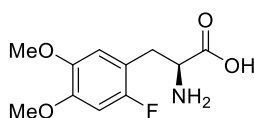

#### (S)-2-amino-3-(2-fluoro-4,5-dimethoxyphenyl)propanoic acid (6p)

White solid, 90% isolated yield.

$^1\text{H NMR}$  (400 MHz,  $\text{D}_2\text{O}+\text{NaOH}$ ):  $\delta$  6.71-6.80 (m, 2H), 3.75 (s, 3H+3H), 3.40 (dd<sub>X</sub> of ABX,  $J = 7.3$ , 6.0, 1H), 2.86 (ddd<sub>A</sub> of ABX,  $J = 13.7$ , 6.0,  $J_{\text{CF}} = 1.0$ , 1H), 2.73 (ddd<sub>B</sub> of ABX,  $J = 13.7$ , 7.3,  $J_{\text{CF}} = 1.0$ , 1H).

$^{13}\text{C NMR}$  (101 MHz,  $\text{D}_2\text{O}+\text{NaOH}$ ):  $\delta$  182.2, 155.4 (d,  $J_{\text{CF}} = 237.1$ ), 147.4 (d,  $J_{\text{CF}} = 10.3$ ), 143.9 (d,  $J_{\text{CF}} = 2.6$ ), 115.8 (d,  $J_{\text{CF}} = 17.8$ ), 113.9 (d,  $J_{\text{CF}} = 6.3$ ), 100.2 (d,  $J_{\text{CF}} = 29.1$ ), 56.7, 56.1, 55.8, 33.7.

**HRMS** (ESI):  $m/z$   $[\text{M}+\text{H}]^+$   $\text{C}_{11}\text{H}_{15}\text{FNO}_4^+$  calcd. 244.0980, found 244.0984.

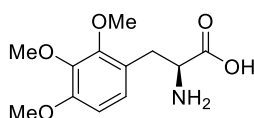

#### (S)-2-amino-3-(2,3,4-trimethoxyphenyl)propanoic acid (6t)

White solid, 88% isolated yield.

$^1\text{H NMR}$  (400 MHz,  $\text{D}_2\text{O}+\text{NaOH}$ ):  $\delta$  6.92 (d,  $J = 8.6$ , 1H), 6.77 (d,  $J = 8.6$ , 1H), 3.80 (s, 3H), 3.79 (s, 3H+3H), 3.37 (dd<sub>X</sub> of ABX,  $J = 8.2$ , 5.9, 1H), 2.88 (dd<sub>A</sub> of ABX,  $J = 13.7$ , 5.9, 1H), 2.65 (dd<sub>B</sub> of ABX,  $J = 13.7$ , 8.2, 1H).

$^{13}\text{C NMR}$  (101 MHz,  $\text{D}_2\text{O}+\text{NaOH}$ ):  $\delta$  182.5, 151.7, 151.3, 141.2, 125.8, 124.6, 108.5, 61.3, 60.9, 57.1, 56.0, 34.8.

**HRMS** (ESI):  $m/z$   $[\text{M}+\text{H}]^+$   $\text{C}_{12}\text{H}_{18}\text{NO}_5^+$  calcd. 256.1179, found 256.1180.

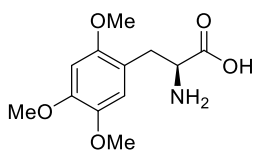

**(S)-2-amino-3-(2,4,5-trimethoxyphenyl)propanoic acid (6u)**

White solid, 68% isolated yield.

**<sup>1</sup>H NMR** (400 MHz, D<sub>2</sub>O+NaOH): δ 6.78 (s, 1H), 6.66 (s, 1H), 3.78 (s, 3H), 3.74 (s, 3H), 3.73 (s, 3H), 3.38 (dd<sub>x</sub> of ABX, *J* = 7.8, 5.8, 1H), 2.86 (dd<sub>A</sub> of ABX, *J* = 13.5, 5.8, 1H), 2.65 (dd<sub>B</sub> of ABX, *J* = 13.5, 7.8, 1H).

**<sup>13</sup>C NMR** (101 MHz, D<sub>2</sub>O+NaOH): δ 182.6, 152.0, 147.4, 141.9, 118.6, 115.2, 98.7, 56.7, 56.6, 56.4, 55.9, 34.8.

**HRMS** (ESI): *m/z* [M+H]<sup>+</sup> C<sub>12</sub>H<sub>18</sub>NO<sub>5</sub><sup>+</sup> calcd. 256.1179, found 256.1180.

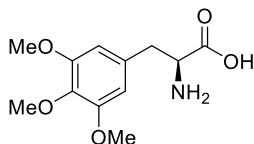

**(S)-2-amino-3-(3,4,5-trimethoxyphenyl)propanoic acid (6s)**

White solid, 74% isolated yield.

**<sup>1</sup>H NMR** (400 MHz, D<sub>2</sub>O+NaOH): δ 6.51 (s, 2H), 3.77 (s, 6H), 3.66 (s, 3H), 3.42 (dd<sub>x</sub> of ABX, *J* = 7.3, 5.5, 1H), 2.86 (dd<sub>A</sub> of ABX, *J* = 13.6, 5.5, 1H), 2.71 (dd<sub>B</sub> of ABX, *J* = 13.6, 7.3, 1H).

**<sup>13</sup>C NMR** (101 MHz, D<sub>2</sub>O+NaOH): δ 181.8, 152.1, 135.1, 134.9, 106.6, 60.8, 57.2, 55.9, 40.8.

**HRMS** (ESI): *m/z* [M+H]<sup>+</sup> C<sub>12</sub>H<sub>18</sub>NO<sub>5</sub><sup>+</sup> calcd. 256.1179, found 256.1187.

## Copies of NMR and HRMS spectra

### (S)-2-amino-3-(2,3-dimethoxyphenyl)propanoic acid (6m)

20191130-1737-B400\_MIB-32.11.fid  
Ref FP1640 IEX  
Group Flitsch\_S

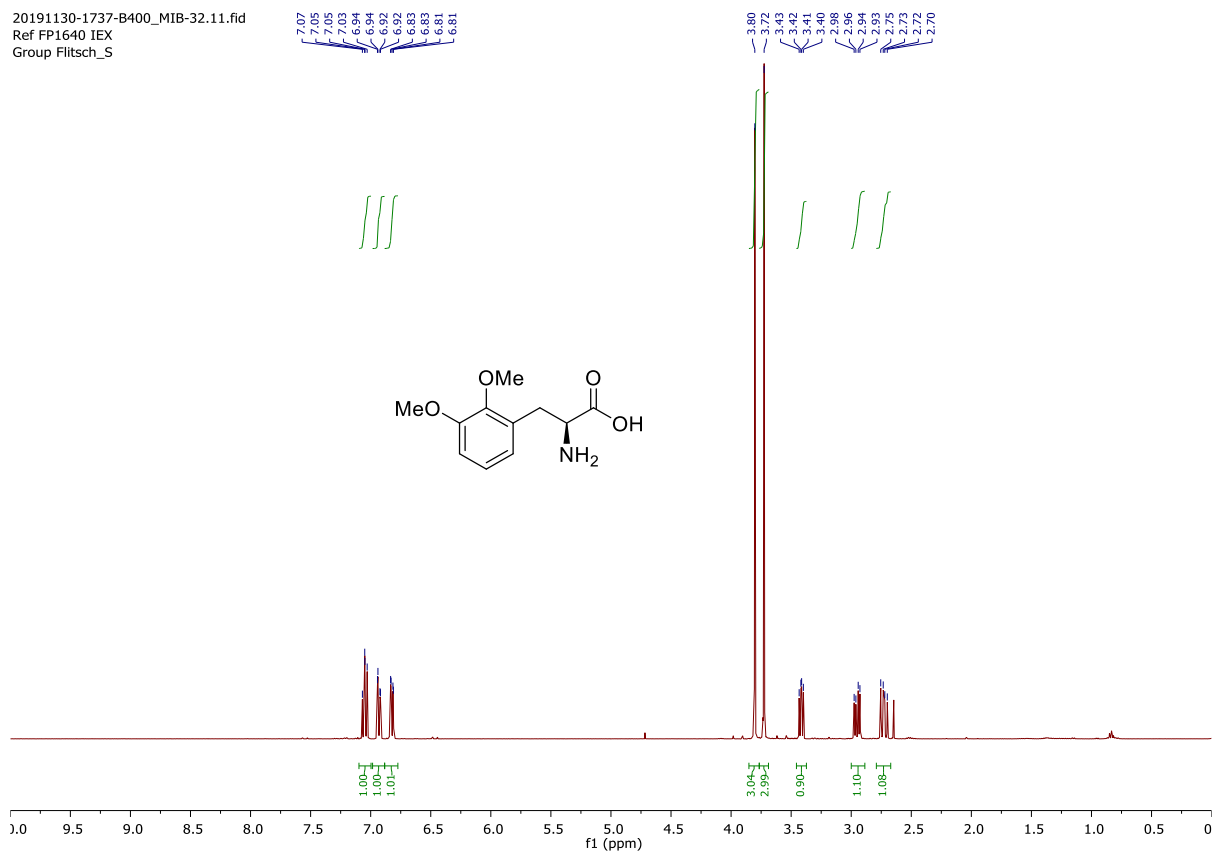

20191130-1737-B400\_MIB-32.12.fid  
Ref FP1640 IEX  
Group Flitsch\_S

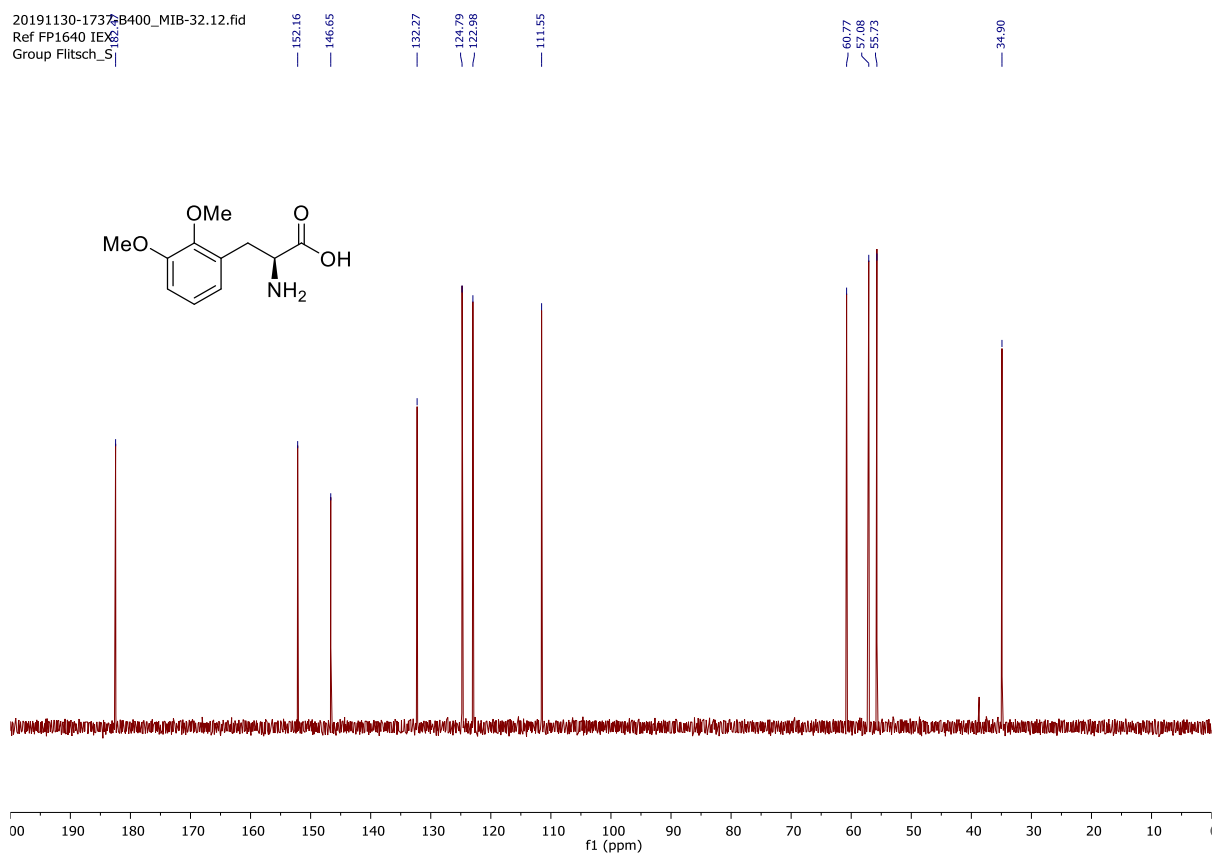

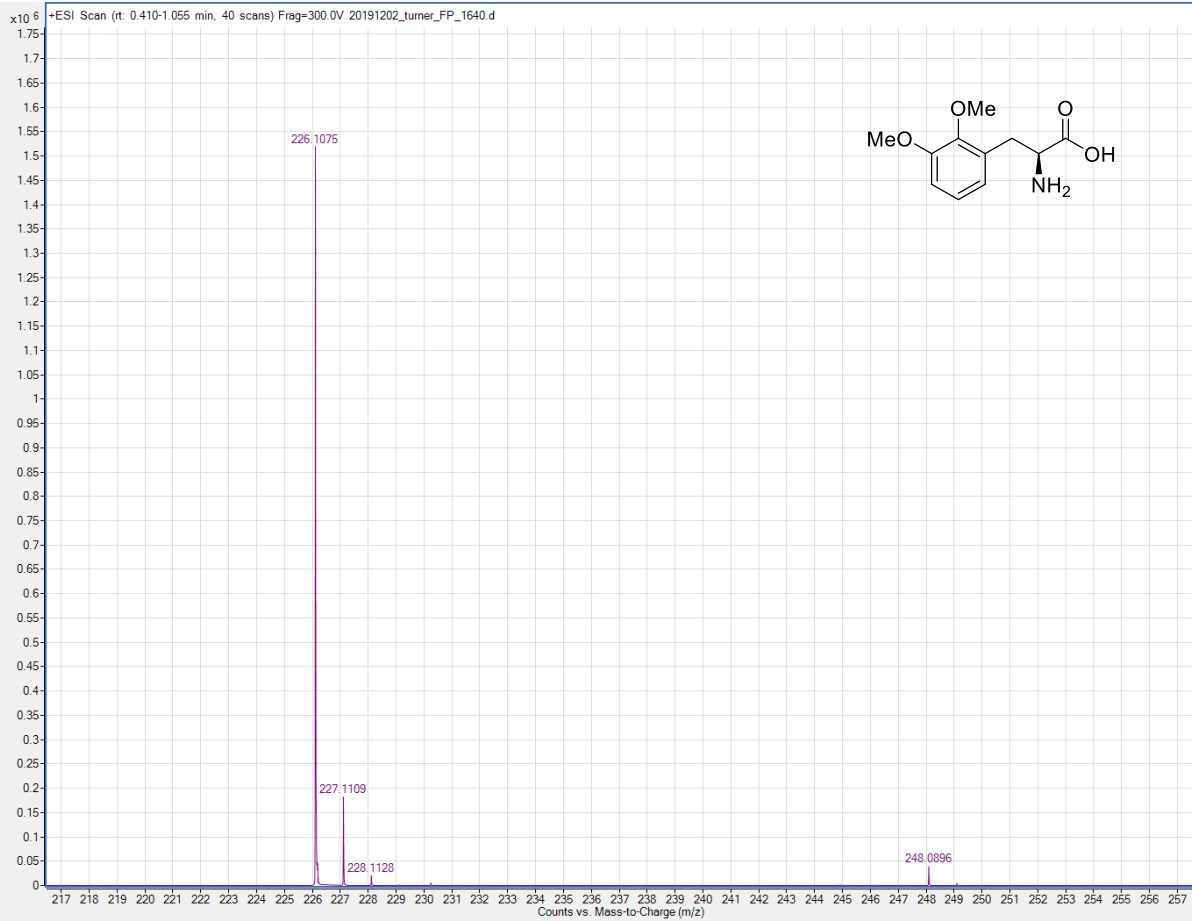

# (S)-2-amino-3-(3,4-dimethoxyphenyl)propanoic acid (60)

20190129-1406-B400\_MIB-14.11.fid  
Ref FP1531-1EX 19  
Group Flitsch\_S

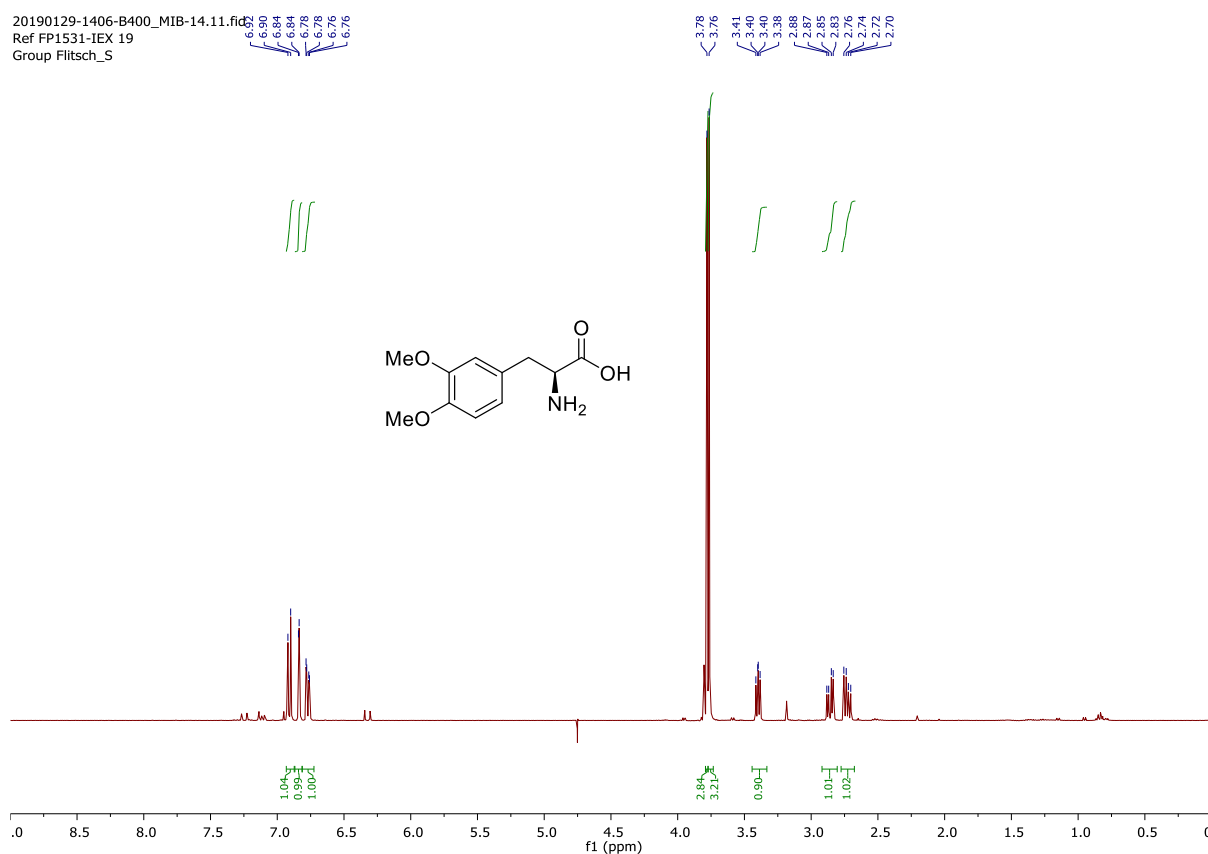

20190129-1406-B400\_MIB-14.12.fid  
Ref FP1531-1EX 19  
Group Flitsch\_S

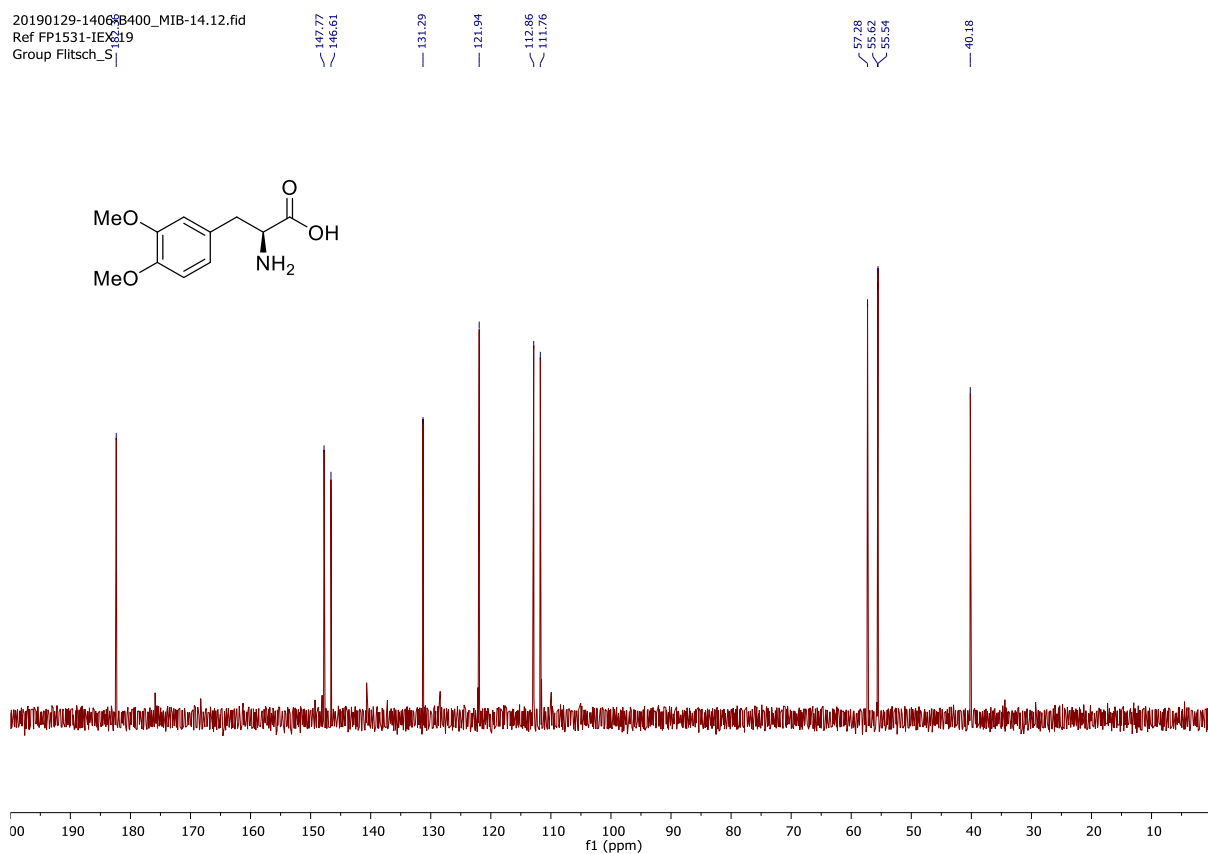

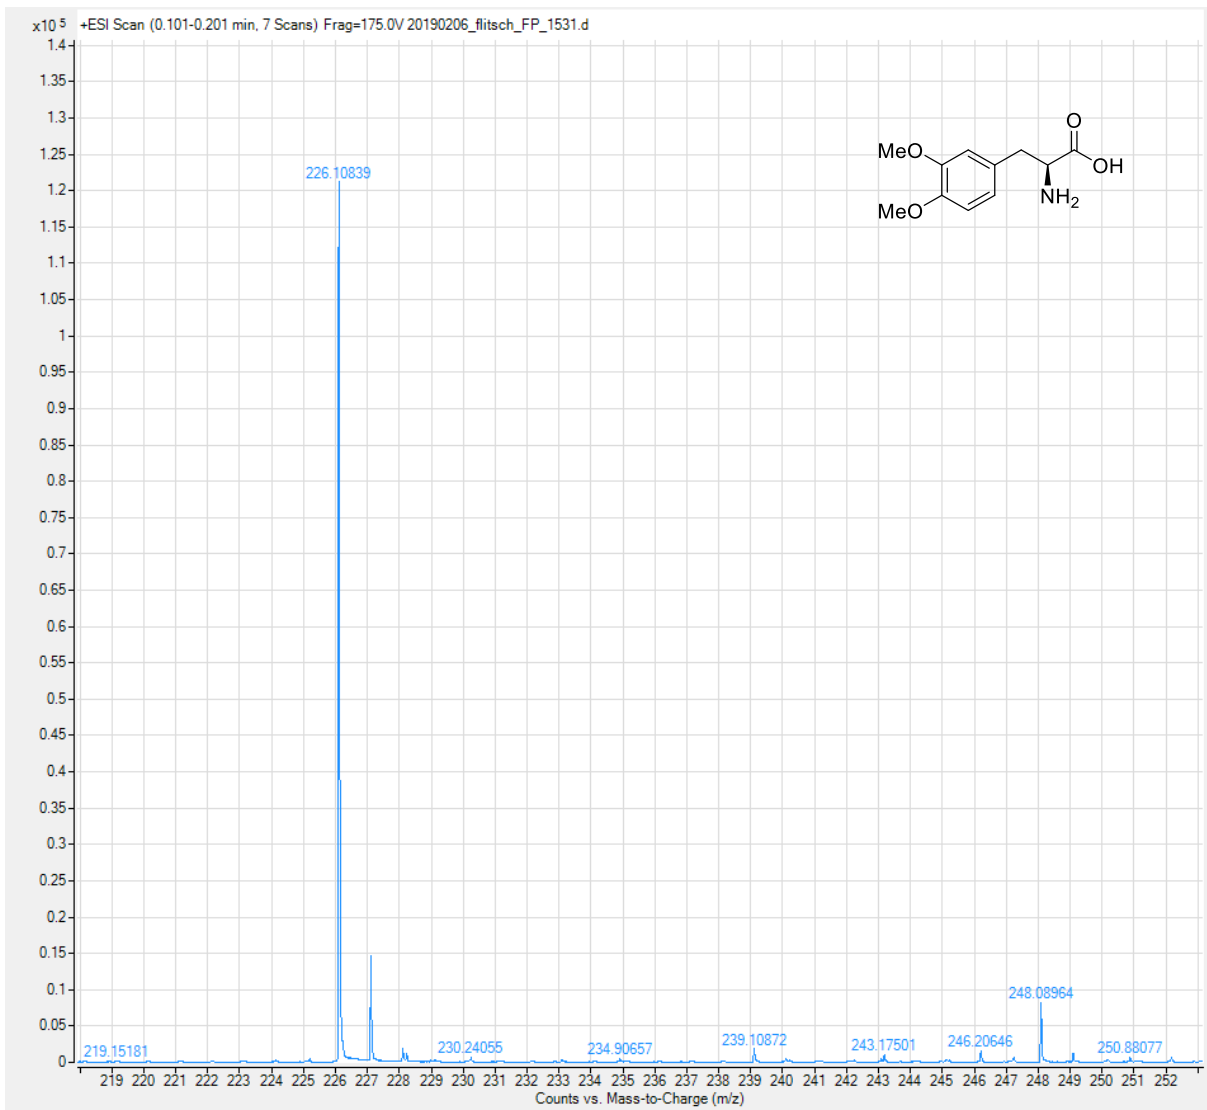

# (S)-2-amino-3-(2-fluoro-4,5-dimethoxyphenyl)propanoic acid (6p)

20190129-1406-B400\_MIB-12.11.fid  
Ref FP1529-1EX 5  
Group Flitsch\_S

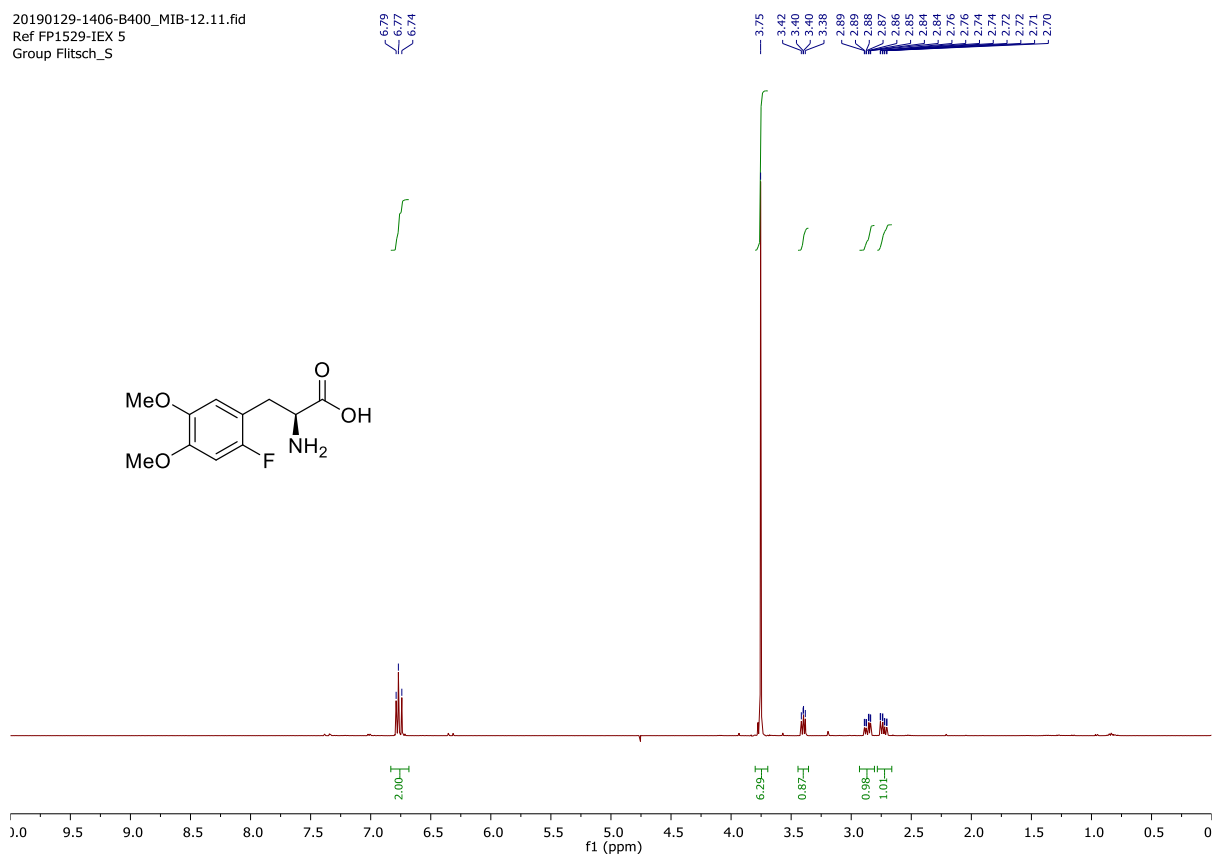

20190129-1406-B400\_MIB-12.12.fid  
Ref FP1529-1EX 5  
Group Flitsch\_S

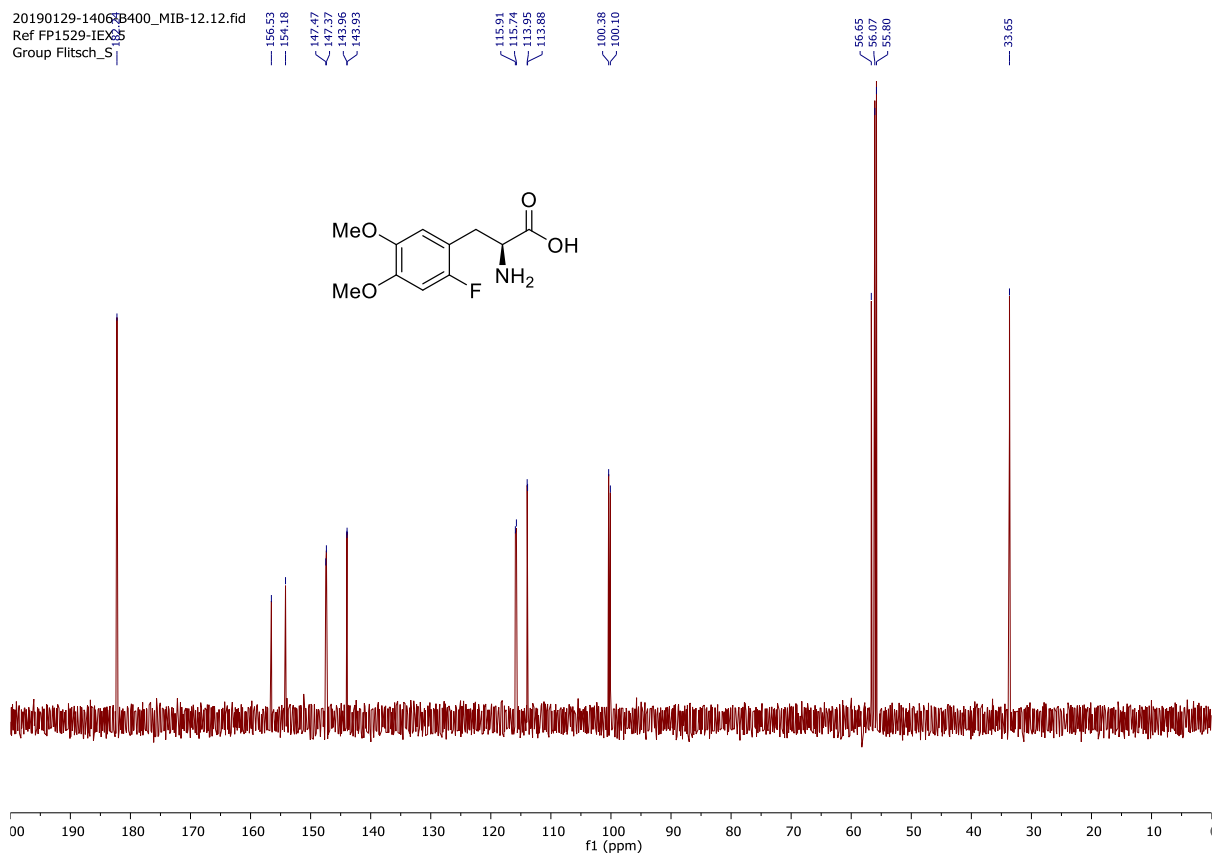

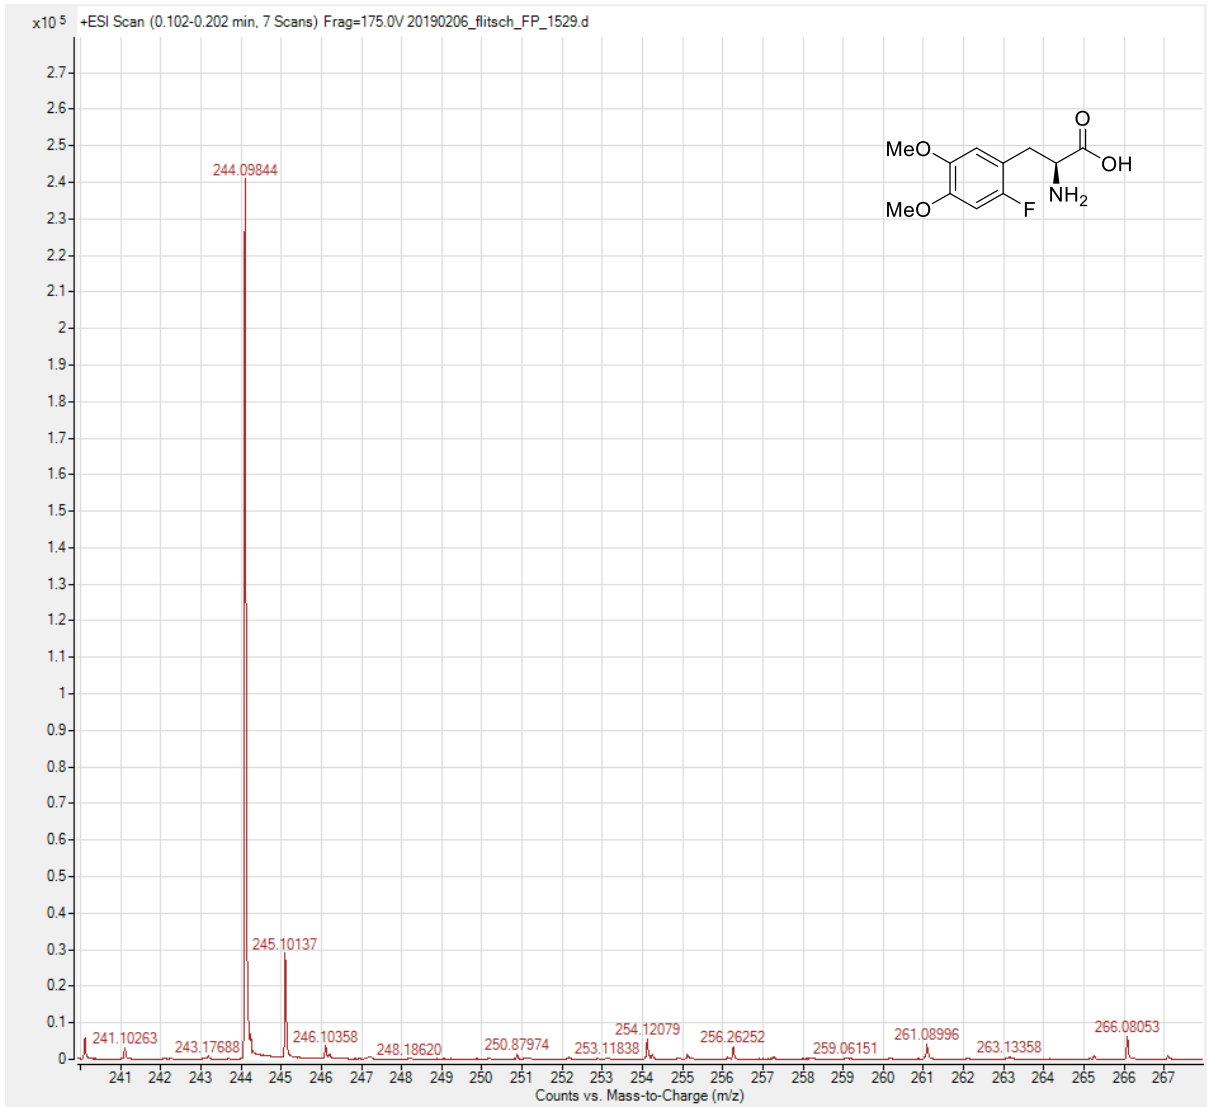



# (S)-2-amino-3-(3,5-dimethoxyphenyl)propanoic acid (6q)

20190129-1406-B400\_MIB-13.11.fid  
Ref FP1530-1EX 10  
Group Flitsch\_S

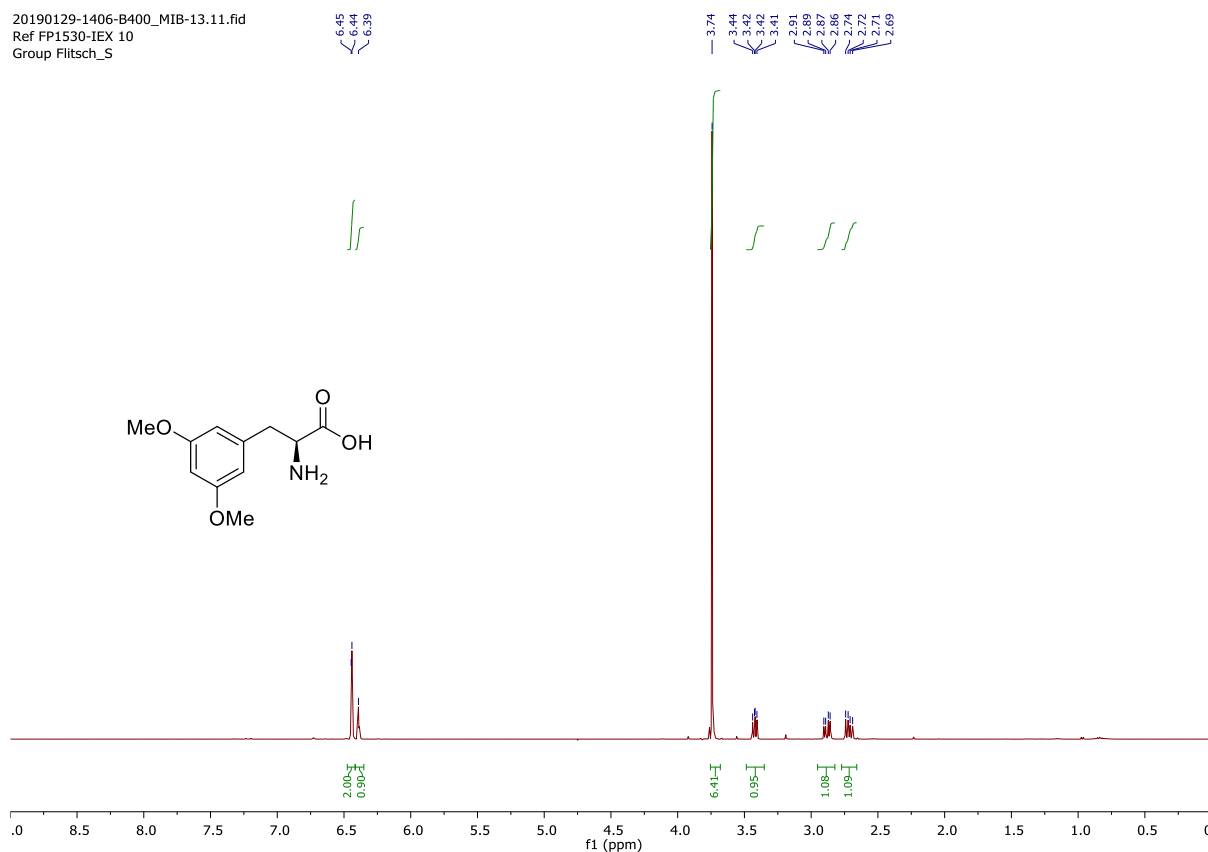

20190129-1406-B400\_MIB-13.12.fid  
Ref FP1530-1EX 10  
Group Flitsch\_S

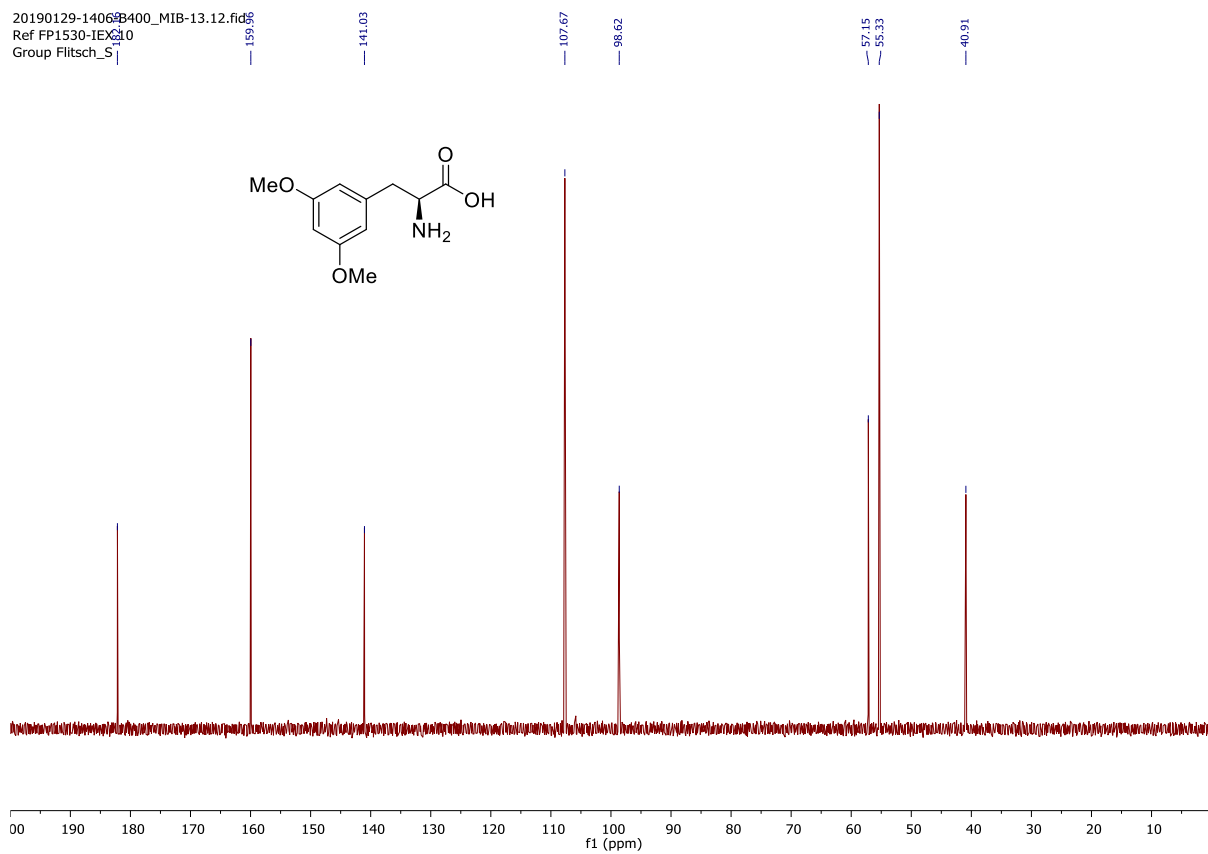

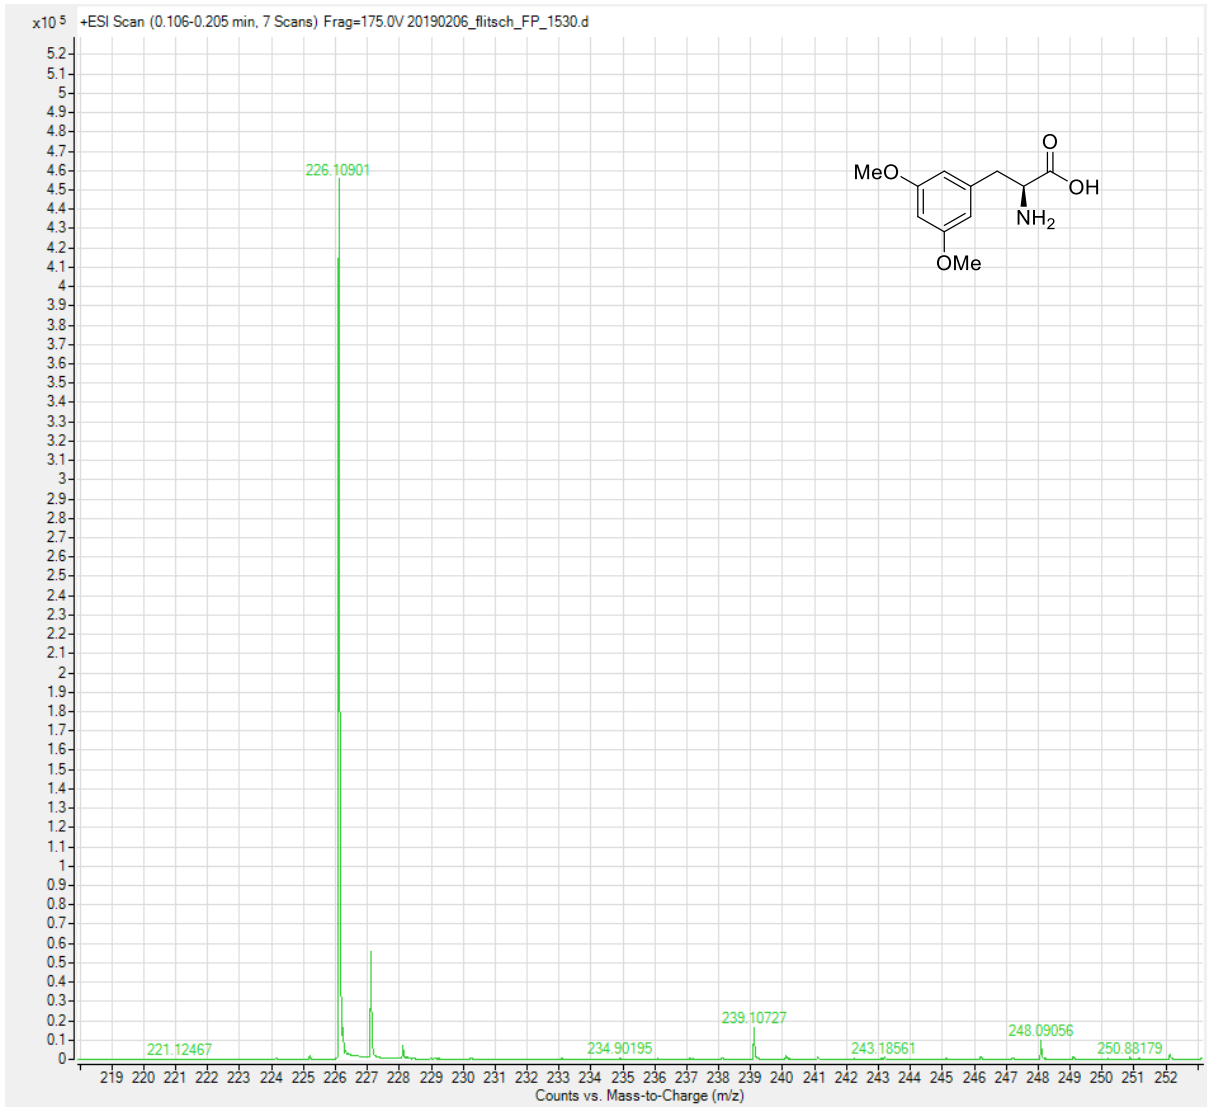

# (S)-2-amino-3-(3,4,5-trimethoxyphenyl)propanoic acid (6s)

20190519-1944-B400\_MIB-54.11.fid  
Ref FP1571 1EX  
Group Flitsch\_S

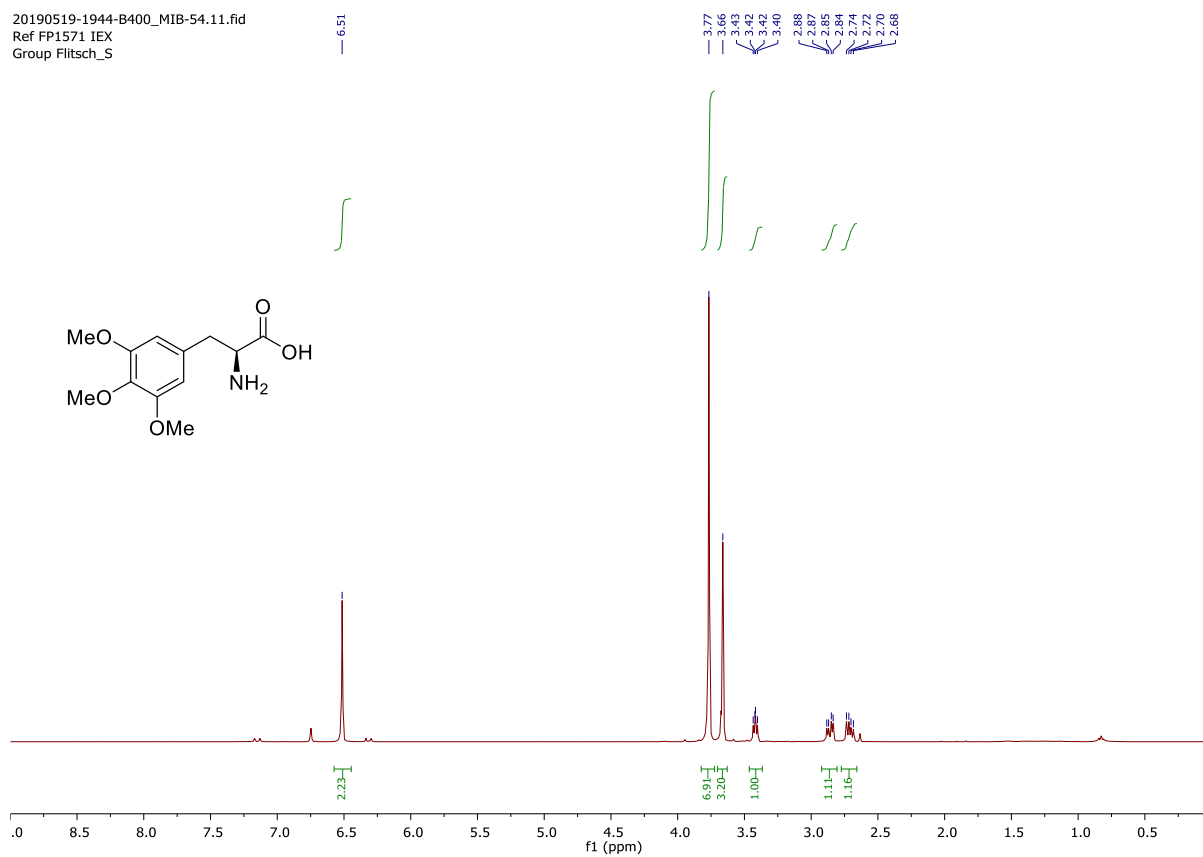

20190520-1005NB400\_MIB-5.10.fid  
Ref FP1571 1EX  
Group Flitsch\_S

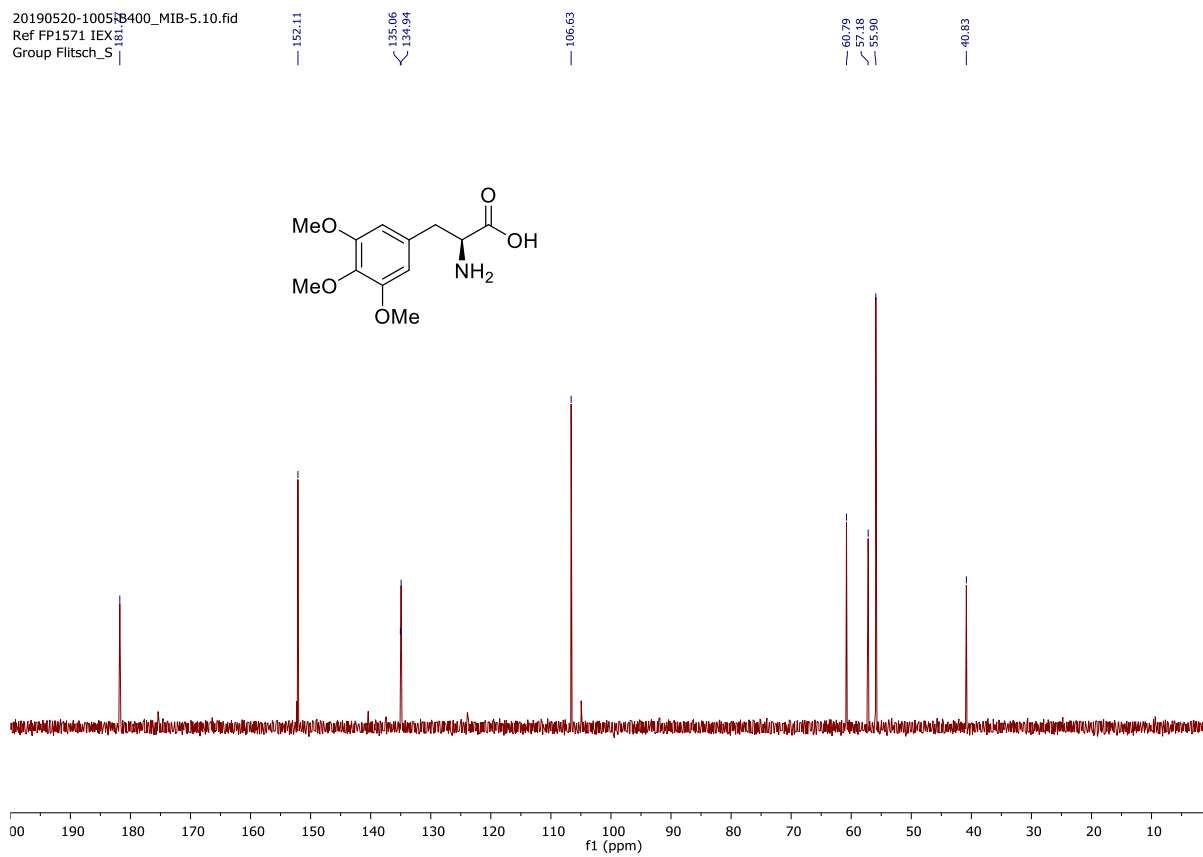

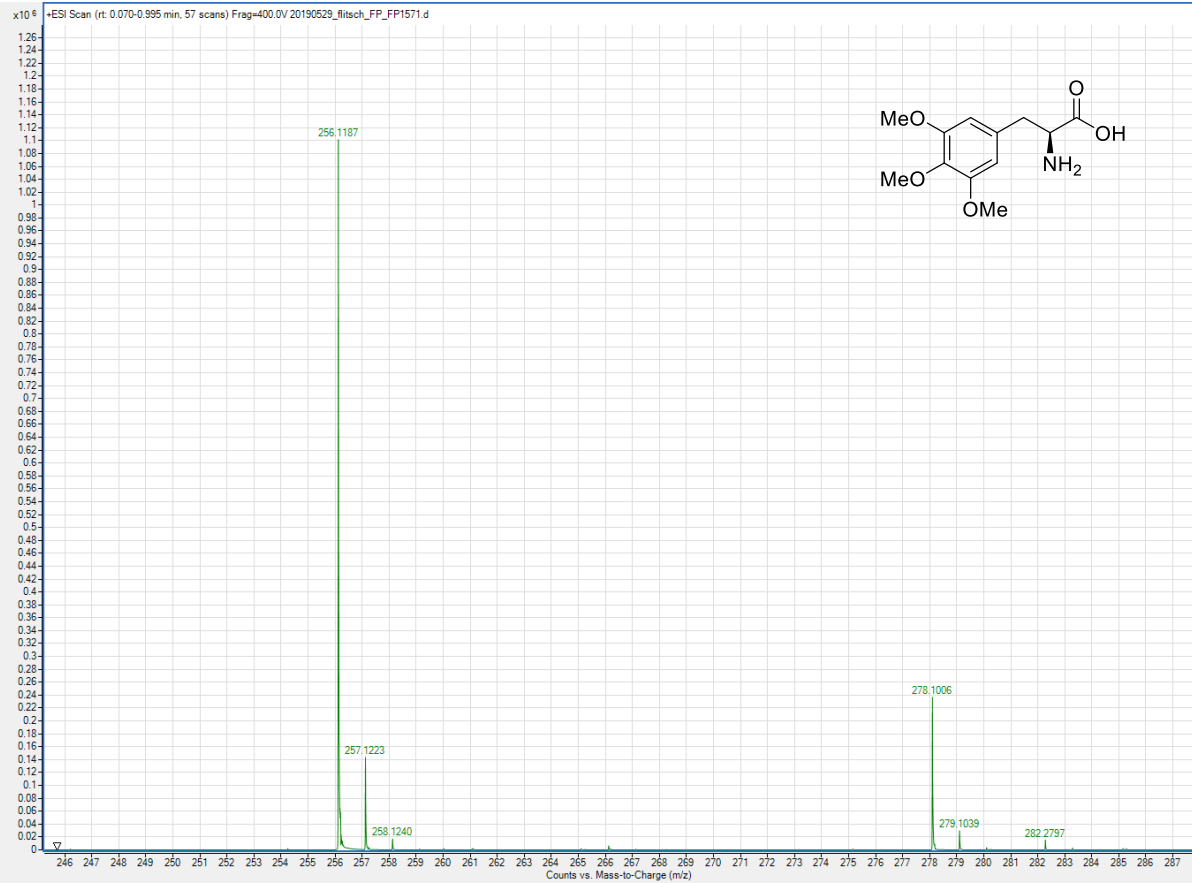

# (S)-2-amino-3-(2,3,4-trimethoxyphenyl)propanoic acid (6t)

20191130-1737-B400\_MIB-33.11.fid  
Ref FP1641 IEX  
Group Flitsch\_S

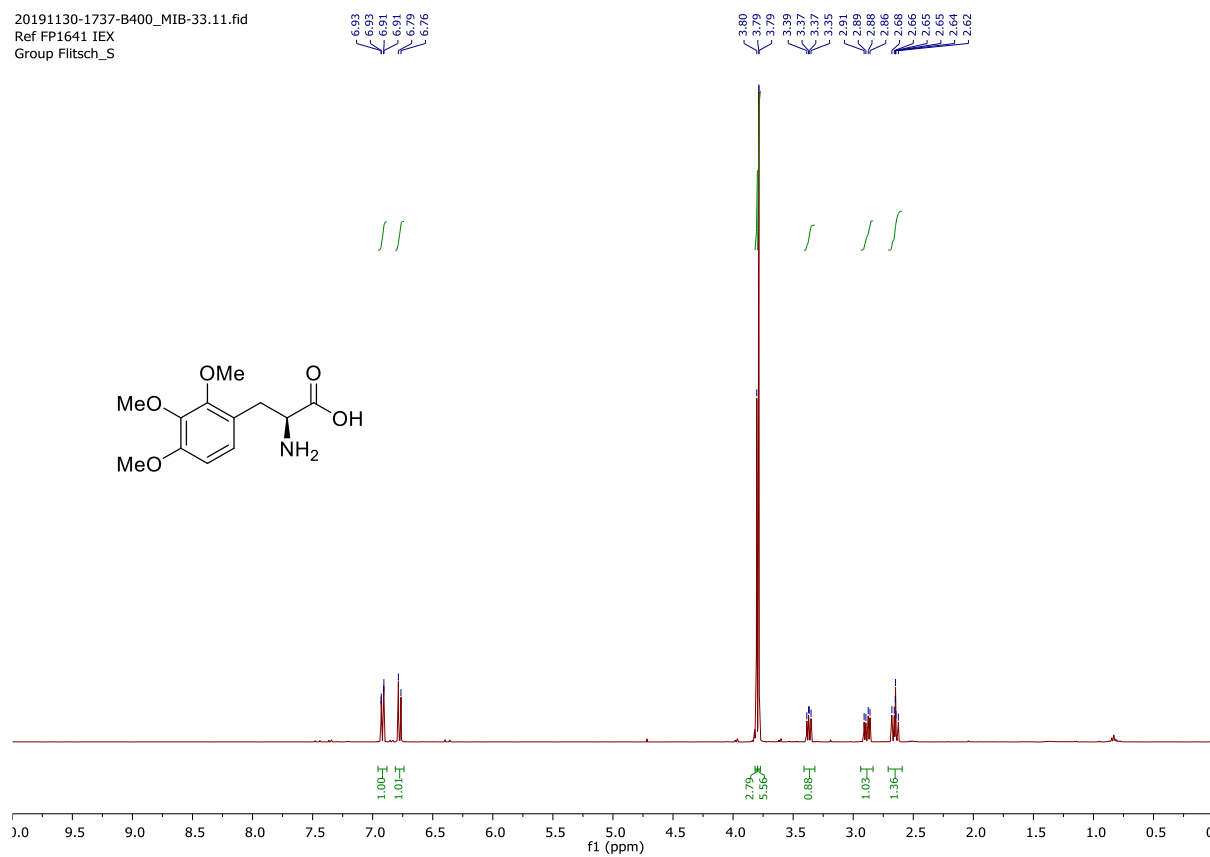

20191130-1737-B400\_MIB-33.12.fid  
Ref FP1641 IEX  
Group Flitsch\_S

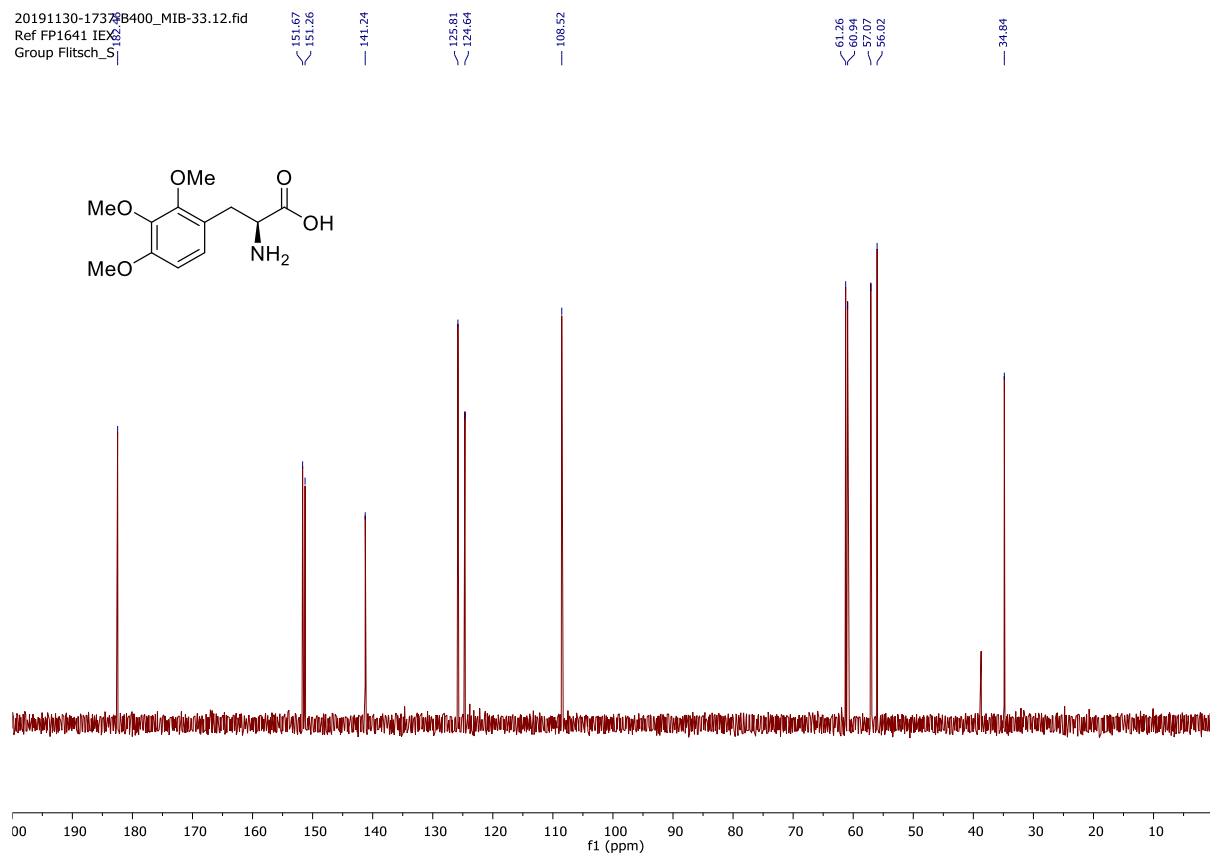

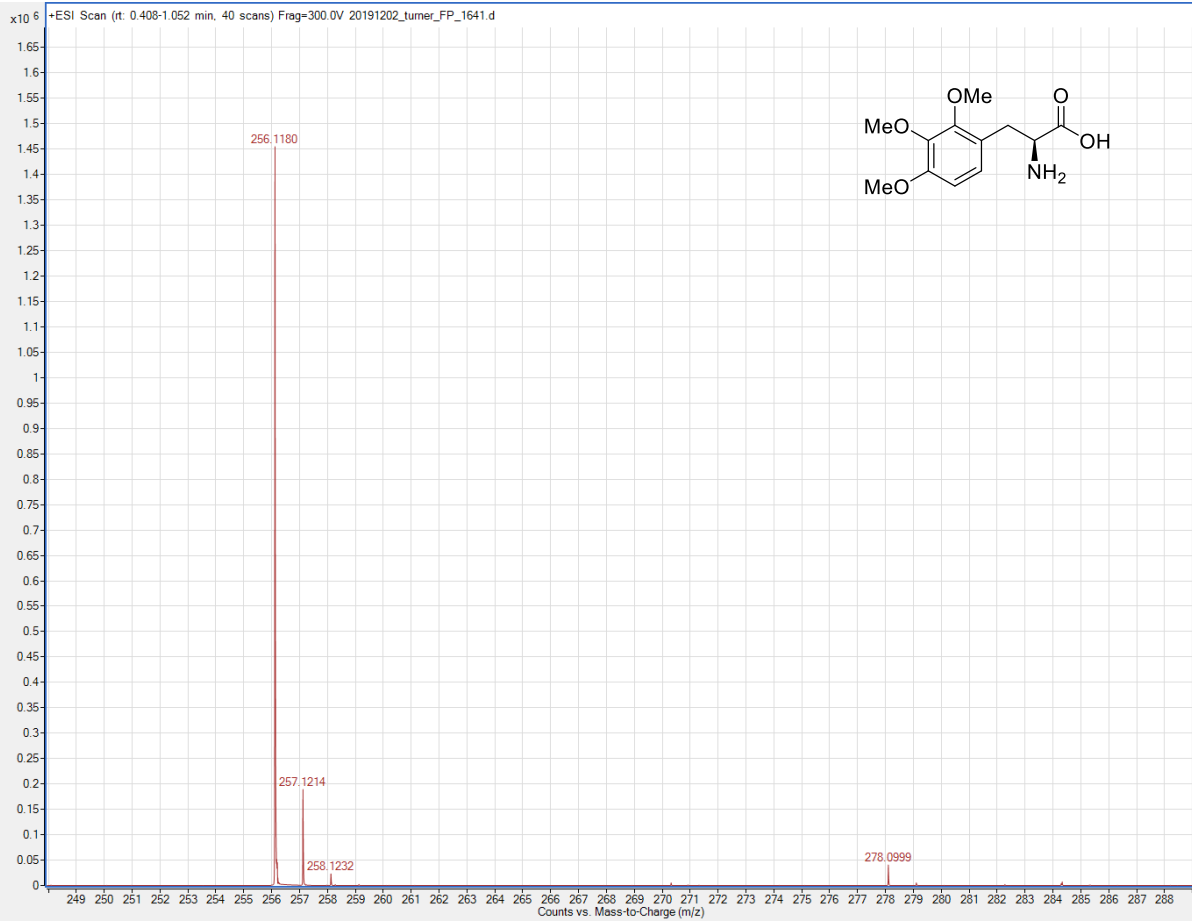

# (S)-2-amino-3-(2,4,5-trimethoxyphenyl)propanoic acid (6u)

20191130-1737-B400\_MIB-34.11.fid  
Ref FP1642 IEX  
Group Flitsch\_S

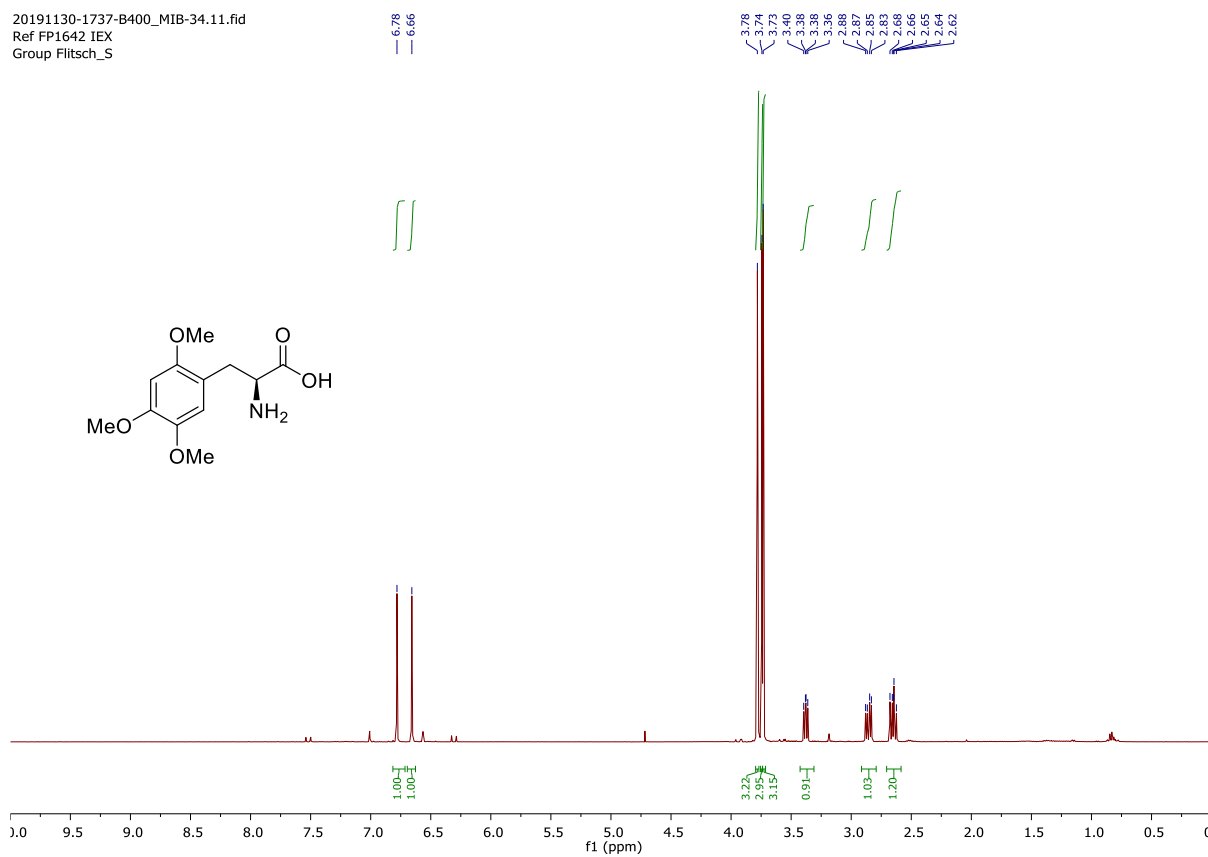

20191130-1737-B400\_MIB-34.12.fid  
Ref FP1642 IEX  
Group Flitsch\_S

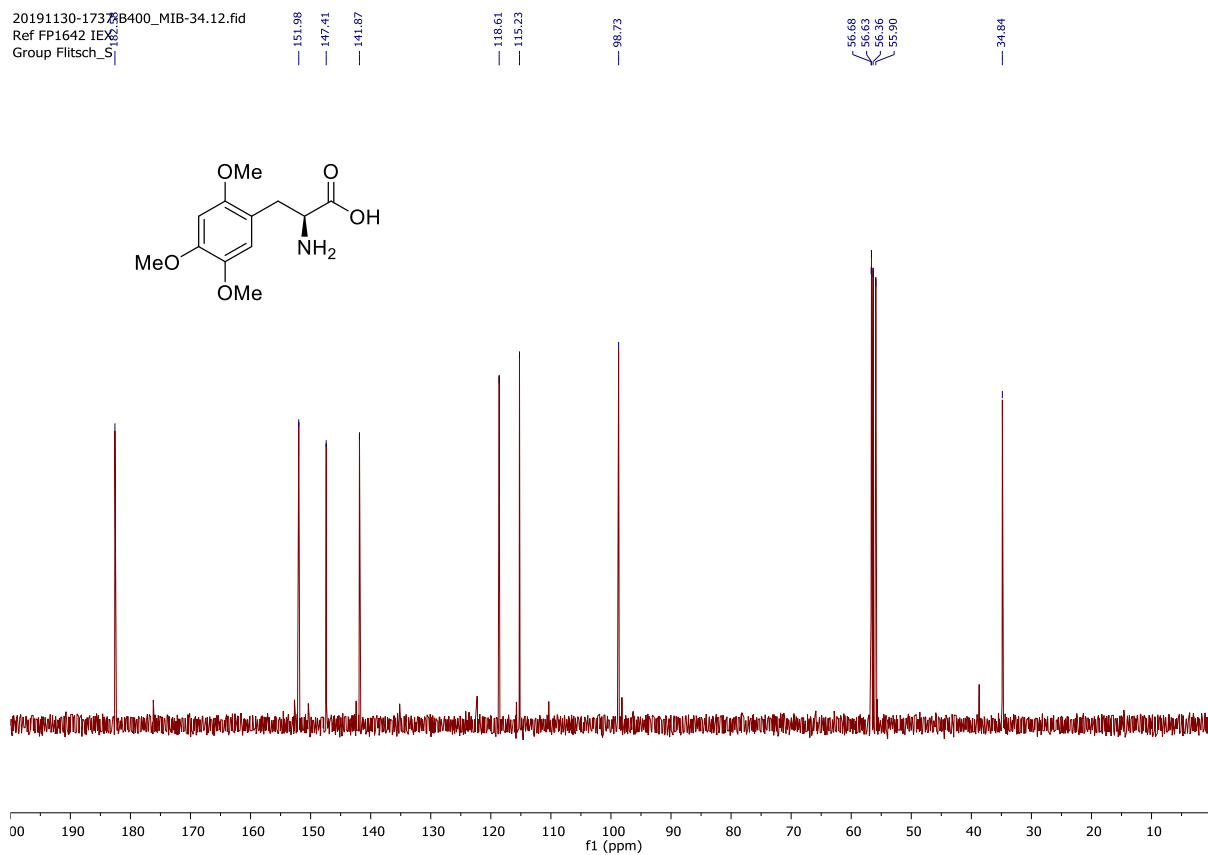

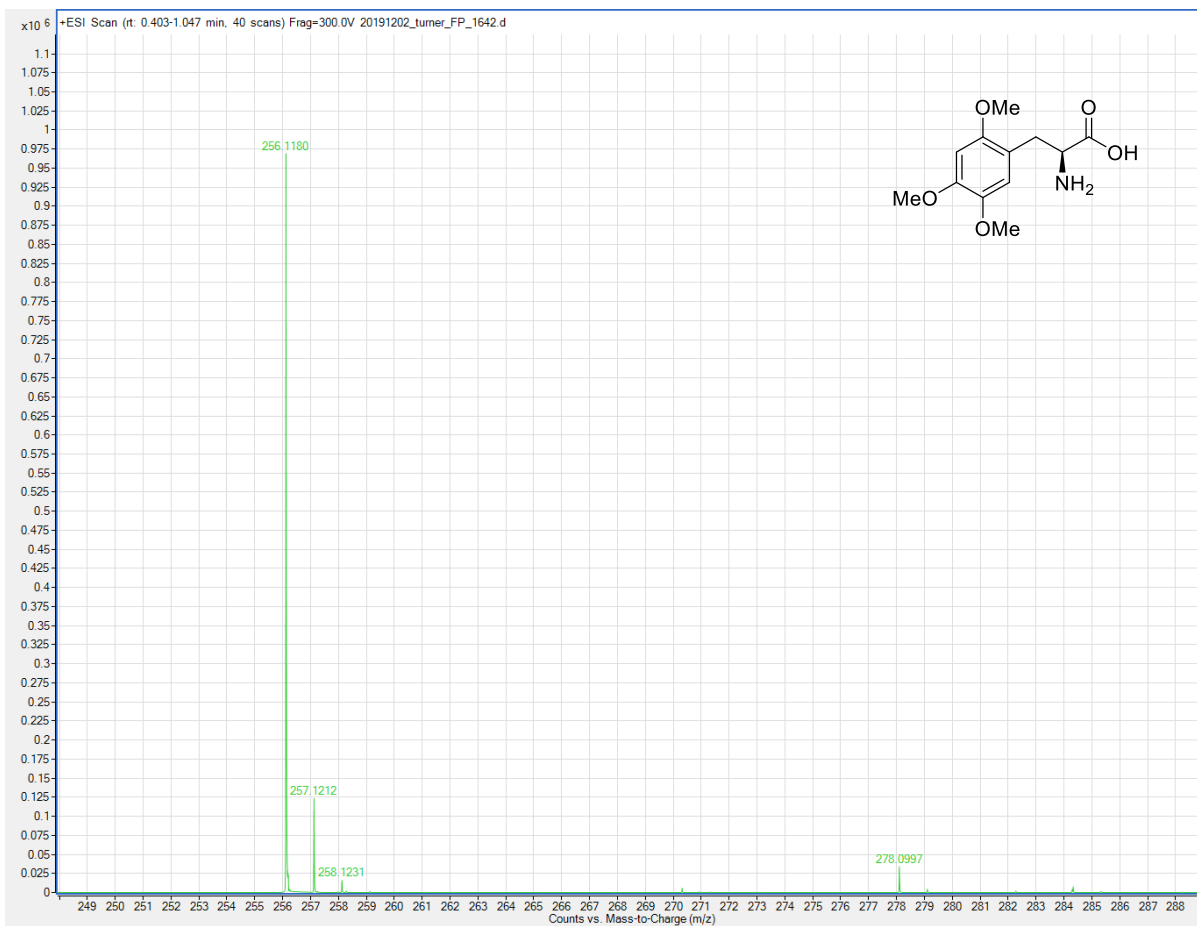



## HPLC traces for the isolated amino acids (S)-6

### Determination of the *ee* values for isolated amino acids (S)-6

In the following figures, the upper trace shows the amino acid isolated from the PAL biotransformation, the lower trace shows a partially racemised sample to highlight the position of the D-enantiomer. The racemisation has been achieved by the addition of L-amino acid deaminase (LAAD) and a non-selective reducing agent (ammonia-borane complex), according to a previously reported method.<sup>[S1][S2]</sup>

### Determination of the *ee* value of (S)-6m

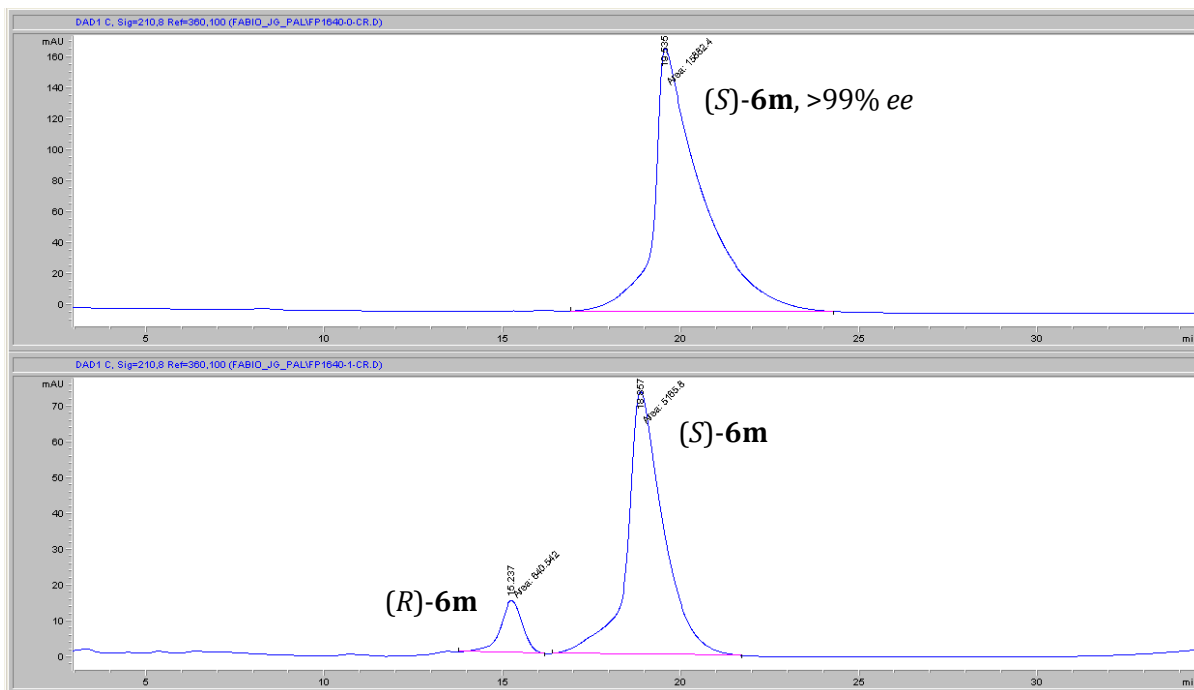

## Determination of the *ee* value of (*S*)-**6o**

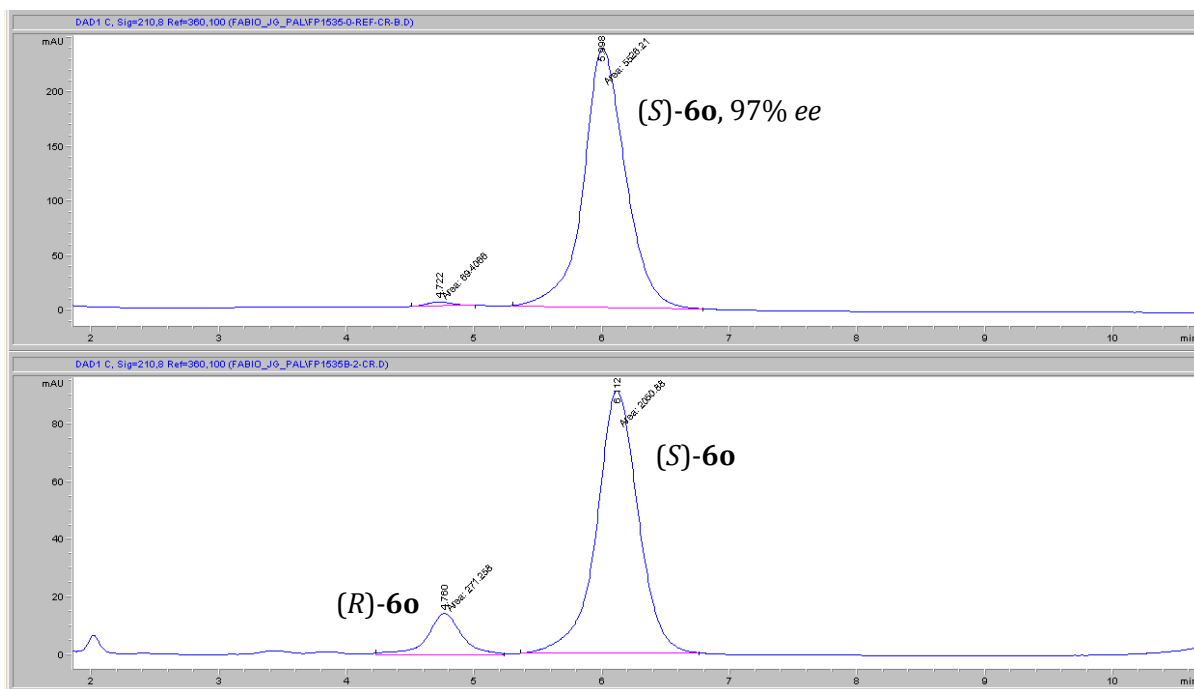

## Determination of the *ee* value of (*S*)-**6p**

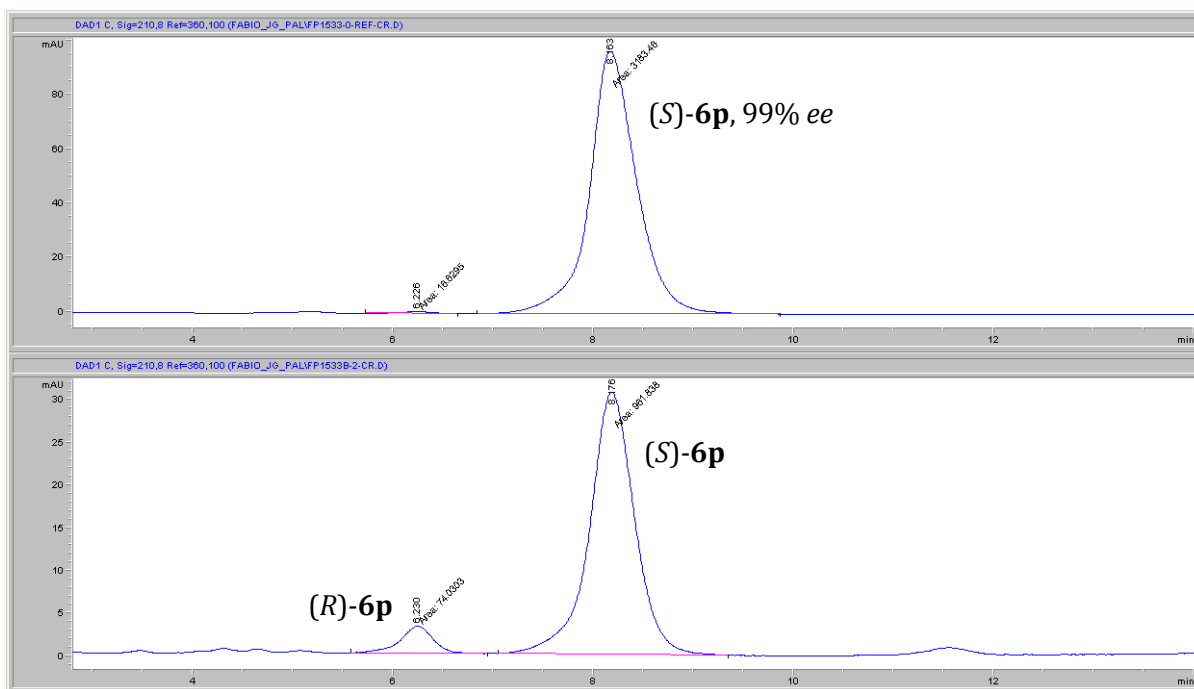

## Determination of the *ee* value of (*S*)-6q

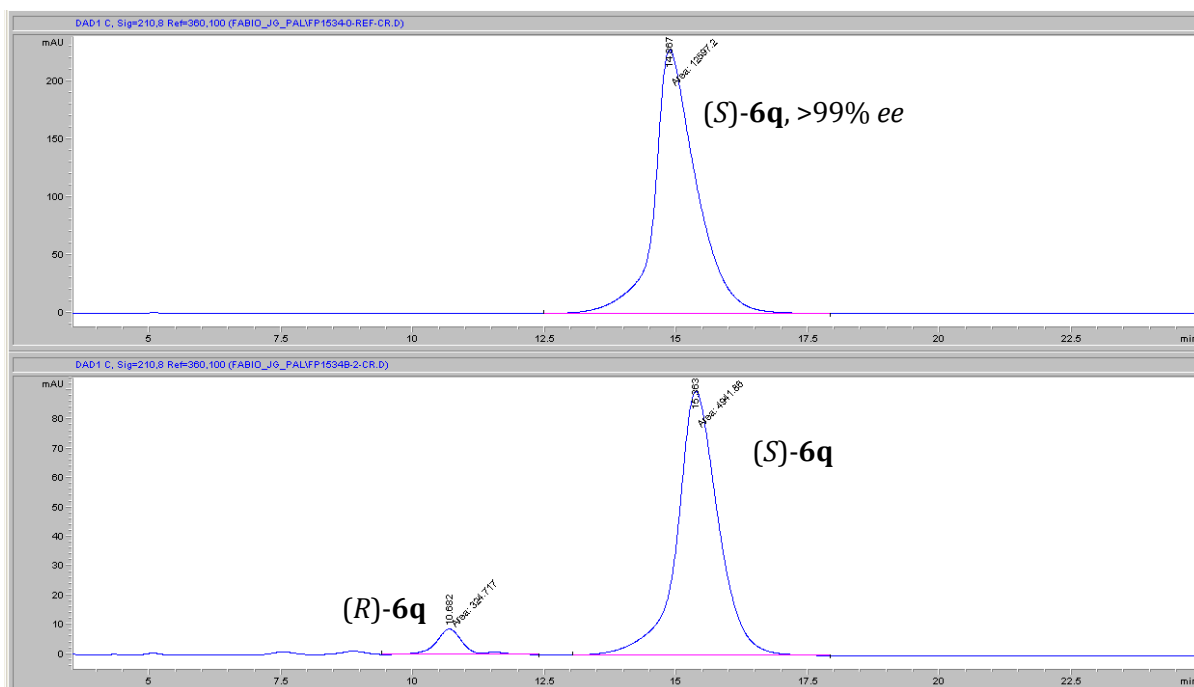

## Determination of the *ee* value of (*S*)-6s

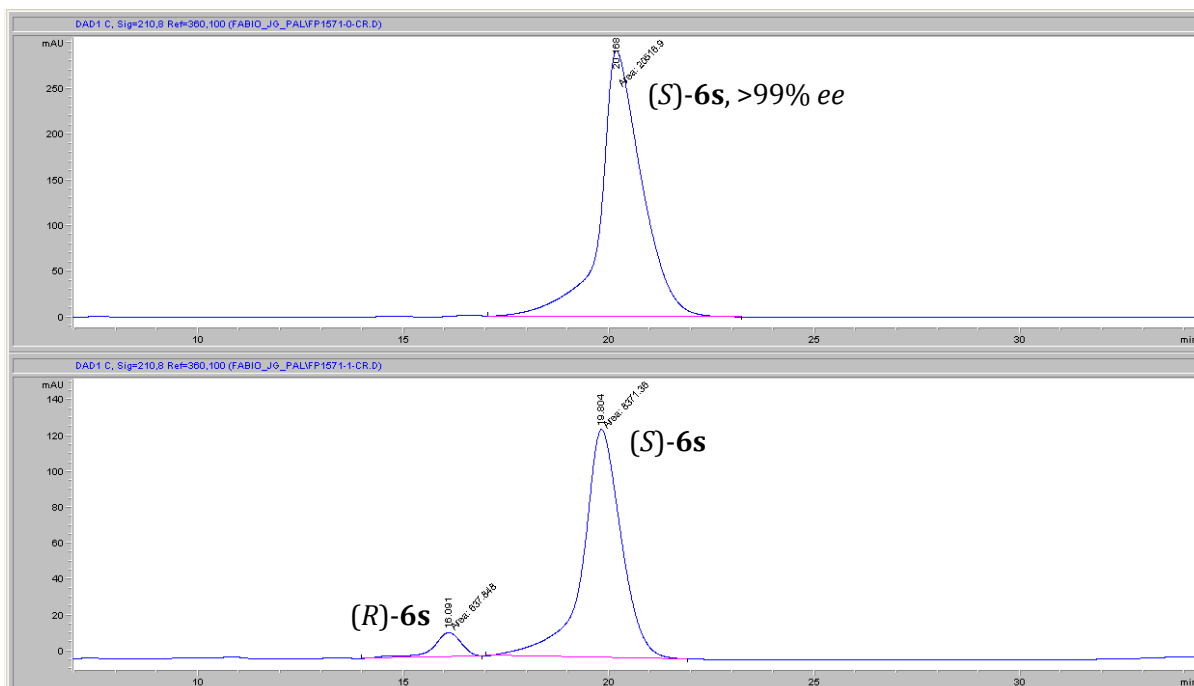

## Determination of the *ee* value of (*S*)-6t

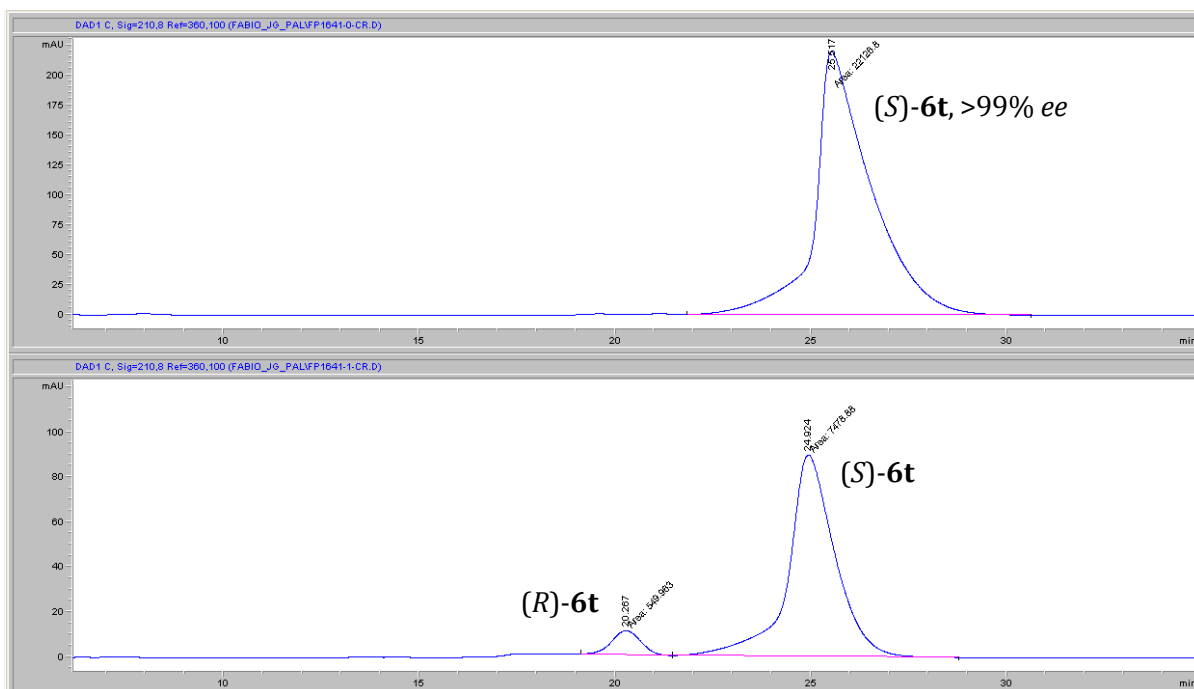

## Determination of the *ee* value of (*S*)-6u

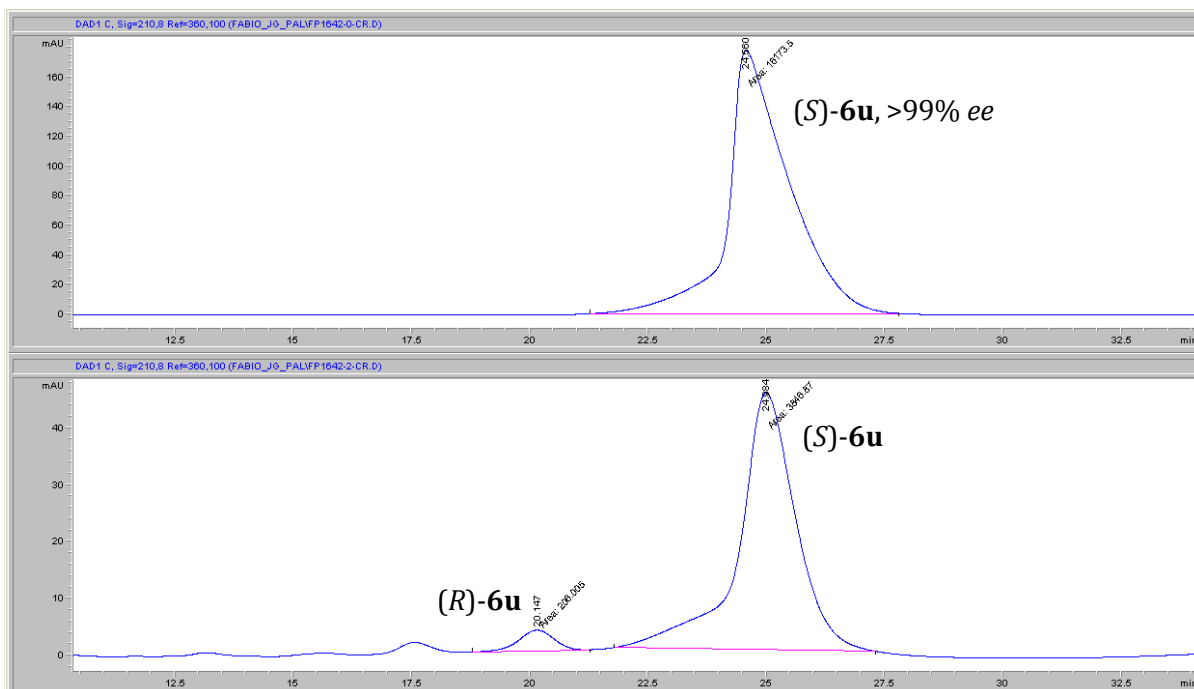

## References

---

- [S1] Parmeggiani F., Lovelock S. L., Weise N. J., Ahmed S. T., Turner N. J., Synthesis of D- and L-Phenylalanine Derivatives by Phenylalanine Ammonia Lyases: A Multienzymatic Cascade Process. *Angew. Chem. Int. Ed.* **2015**, *54*, 4608-4611.
- [S2] Ahmed S. T., Parmeggiani F., Weise N. J., Flitsch S. L., Turner N. J., Synthesis of Enantiomerically Pure Ring-Substituted L-Pyridylalanines by Biocatalytic Hydroamination. *Org. Lett.* **2016**, *18*, 5468-5471.
